# Supplementary material
Source: Royal Society of Chemistry journal article supplement (doi:10.1039/d6va00023a)
Supplement: d6va00023a1.pdf [file d6va00023a1.pdf]

## Supporting Information

### **Deciphering the plastisphere nexus in wastewater treatment: distinct microbial colonization on biodegradable and conventional microplastics**

Gaurav Bhardwaj<sup>1</sup>, Lachi Wankhede<sup>1</sup>, Ratul Kumar Das<sup>1</sup>, Ahmed Eldyasti<sup>1</sup>, Ahmed Koubaa<sup>2</sup>,  
Satinder Kaur Brar<sup>1\*</sup>

<sup>1</sup>Civil Engineering Department, Lassonde School of Engineering, York University, North  
York, Ontario M3J1P3, Canada.

<sup>2</sup>Forest Research Institute (Institut de recherche sur les forêts–IRF), Université du Québec en  
Abitibi–Témiscamingue (UQAT), 445 Boul. de l'Université, Rouyn-Noranda J9X 5E4, QC,  
Canada

\*Corresponding author: Satinder Kaur Brar ([satinder.brar@lassonde.yorku.ca](mailto:satinder.brar@lassonde.yorku.ca))

### **Text S1: Composition and preparation of synthetic wastewater**

The influent synthetic wastewater was prepared to yield a chemical oxygen demand of approximately  $500 \pm 50$  mg/L, using glucose as the carbon source. Ammonium chloride (191 mg/L) and potassium dihydrogen phosphate (22 mg/L) supplied 50 mg/L  $\text{NH}_4^+\text{-N}$  and 5 mg/L  $\text{PO}_4^{3-}\text{-P}$ , respectively. Magnesium sulphate heptahydrate and calcium chloride dihydrate were each added at 5 mg/L as macronutrients. A trace element mix (1 mL per liter) comprised, in mg/L: ferric chloride hexahydrate (1500 mg/L), boric acid (150 mg/L), copper (II) sulfate pentahydrate (30 mg/L), potassium iodide (30 mg/L), manganese (II) chloride tetrahydrate (120 mg/L), sodium molybdate dihydrate (60 mg/L), zinc sulfate heptahydrate (120 mg/L), and cobalt (II) chloride hexahydrate (150 mg/L). Before reactor feeding, the pH was adjusted to  $7.5 \pm 0.3$  with sodium bicarbonate.

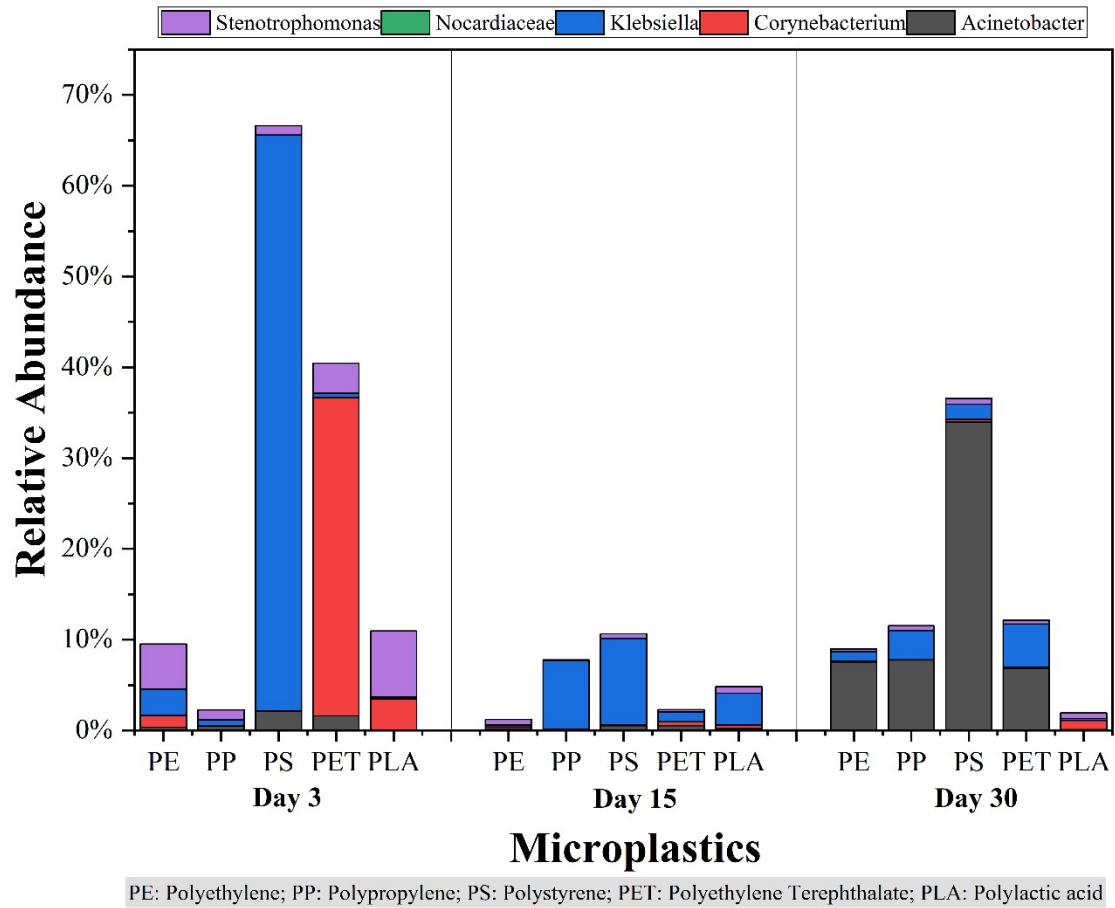

**Figure S1: Relative abundance of genera comprising key pathogenic species observed in MPs associated biofilm at different incubation times (3 d, 15 d and 30 d).**

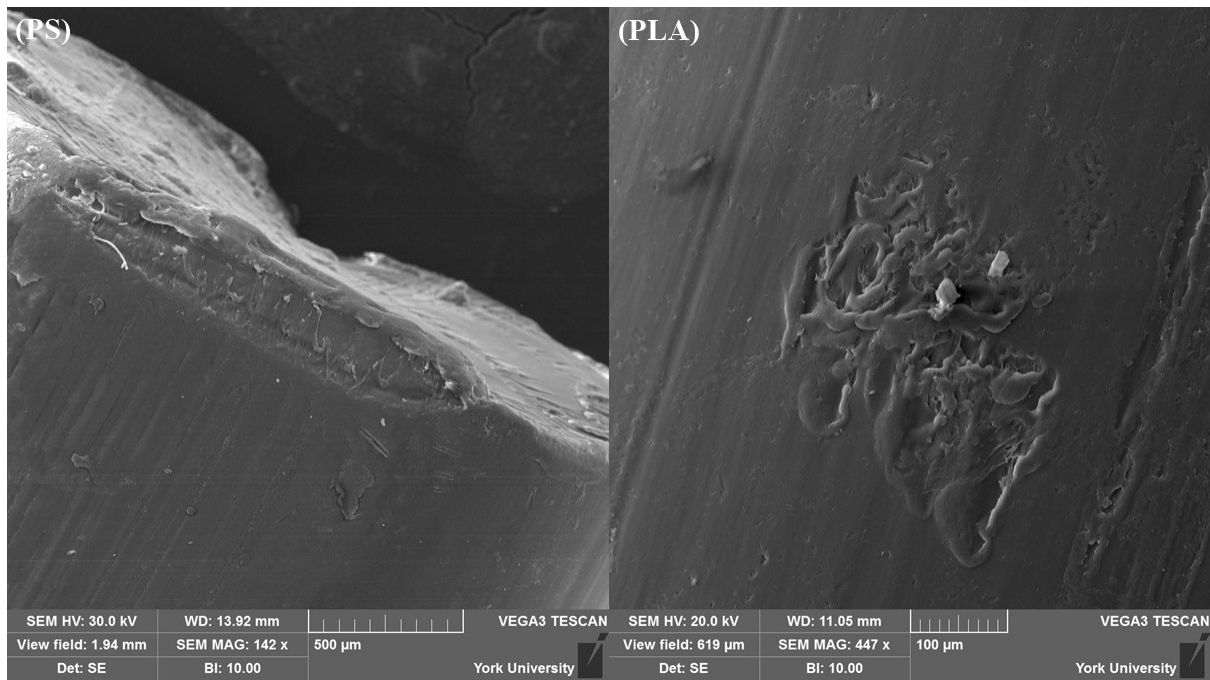

**Figure S2: Morphological analysis of MP surfaces via SEM after 30-day exposure in SBRs**
